# Supplementary material
Source: PubMed Central journal article supplement (PMC9038704)
Supplement: NIHMS1798789-supplement-SI.pdf [file NIHMS1798789-supplement-SI.pdf]

## Supporting Information

Accurate prediction of aqueous solvation free energies using 3D atomic  
feature-based graph neural network with transfer learning

*Dongdong Zhang<sup>1</sup>, Song Xia<sup>1</sup> and Yingkai Zhang<sup>1,2\*</sup>*

<sup>1</sup>Department of Chemistry, New York University, New York, New York 10003, United States

<sup>2</sup>NYU-ECNU Center for Computational Chemistry at NYU Shanghai, Shanghai 200062, China

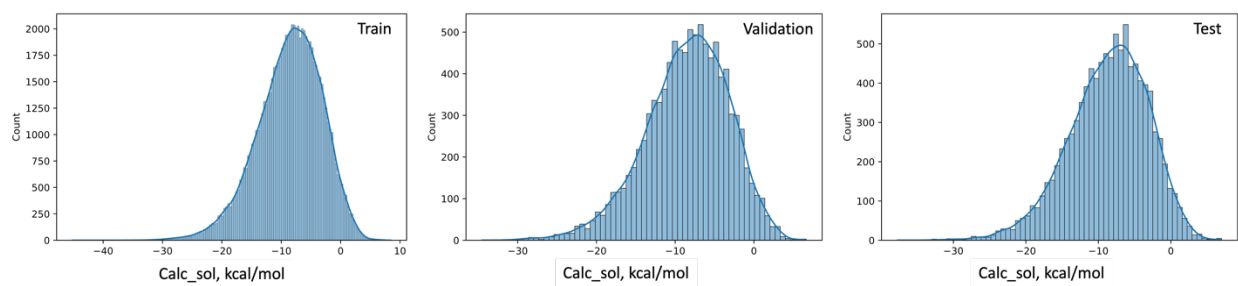

Figure S1. Data distributions for Frag20-Aqsol-100K with fixed data split. Sizes for train/validation/test are 80K, 10K and 10K, respectively.

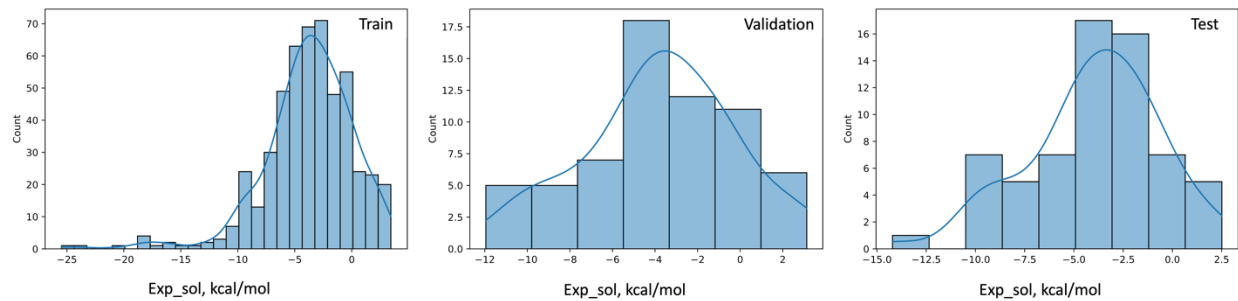

Figure S2. Data distributions for FreeSolv with fixed data split. Sizes for train/validation/test are 502, 63 and 65, respectively.

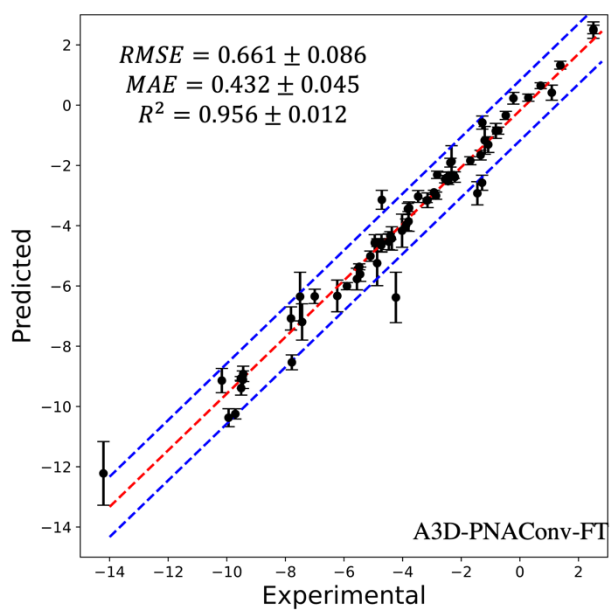

**Figure S3.** Scatter plots between predicted values and experimental values on the test set (65 compounds) of FreeSolv for A3D-PNACConv-FT. The dashed blue lines correspond to  $\pm 1$  kcal/mol.

Table S1. 2D bond attributes and the corresponding descriptions and encoding methods

| Attributes | Descriptions                                   | Size | Encoding |
|------------|------------------------------------------------|------|----------|
| Type       | Single, double, triple, aromatic               | 4    | One-hot  |
| conjugated | whether the bond is conjugated                 | 1    | -        |
| In ring    | whether the bond is part of an aromatic system | 1    | -        |

Table S2. The related functions in MPNN for selected GNN modules

| GNN <sup>a</sup>      | Message function                                | Updating function                 | Aggregation method | Use bond information or not | Total # of trainable parameters <sup>b</sup> |
|-----------------------|-------------------------------------------------|-----------------------------------|--------------------|-----------------------------|----------------------------------------------|
| GIN <sup>1</sup>      | $\sum_{w \in N(v)} h_w^t$                       | $h_v^t + m_v^{t+1}$               | SUM                | NO                          | (79K, 100K)                                  |
| GINEConv <sup>2</sup> | $\sum_{w \in N(v)} \text{ReLU}(h_w^t + e_{vw})$ | $h_v^t + m_v^{t+1}$               | SUM                | YES                         | (80K, 110K)                                  |
| NNConv <sup>3</sup>   | $\sum_{w \in N(v)} h_w^t \cdot e_{vw}$          | $\text{concat}(h_v^t, m_v^{t+1})$ | SUM                | YES                         | (5.31M, 5.33M)                               |
| PNACConv <sup>4</sup> | $\oplus (h_v^t + h_w^t + e_{vw})$               | $\text{concat}(h_v^t, m_v^{t+1})$ | PNA                | YES                         | (1.21M, 1.23M)                               |
| SuperGAT <sup>5</sup> | $\sum_{w \in N(v)} \alpha_{vw} h_w^t$           | $h_v^t + m_v^{t+1}$               | Weighted summation | NO                          | (81K, 110K)                                  |

<sup>a</sup>Besides the listed GNNs, we also applied D-MPNN for comparison. D-MPNN adopted more complex way to construct the message and updating functions which are based on Loopy Belief Propagation. Edge information was used. Check the methods section ‘Directed MPNN’ in the original paper<sup>6</sup> for more details.

<sup>b</sup>Total number of trainable parameters for 2D feature based and 3D feature-based models under each GNN. In the parenthesis, the first number is for 2D and the second is for 3D, respectively. For D-MPNN, it has 71K for 2D and 120K for 3D.

Table S3. 2D atomic attributes and the corresponding descriptions and encoding methods.

| Attributes                  | Descriptions                                      | Size | Encoding |
|-----------------------------|---------------------------------------------------|------|----------|
| Types                       | Element symbols                                   | 11   | One-hot  |
| Hybridizations              | sp, sp2, sp3, sp3d, or sp3d2                      | 5    | One-hot  |
| Degree                      | 0, 1, 2, 3, 4, 5                                  | 6    | One-hot  |
| Explicit valence            | 0, 1, 2, 3, 4, 5, 6                               | 7    | One-hot  |
| Implicit valence            | 0, 1, 2, 3, 4, 5                                  | 6    | One-hot  |
| Aromaticity                 | whether the atom is part of an aromatic system    | 1    | -        |
| In ring of different sizes* | Whether the atom is in a ring of size 3 or larger | 11   | One-hot  |

\* Ring size ranges from 3 to 20. This atom attribute takes up 11 positions in the final atom feature vector because we assign the first 10 positions for whether one atom is in a ring of size within [3,12], and the last 1 position for whether one atom is in a ring of size within [13,20].

Table S4. Key hyper parameters for the model building and training. All internal hyper parameters in each GNN modules are set as default.

| <b>Hyper parameters</b>       | <b>Values</b> |
|-------------------------------|---------------|
| # of encoder layers           | 3             |
| # hidden size                 | 120           |
| # read out layers             | 3             |
| Weights initialization method | Xavier_norm   |
| Optimizer                     | Adam          |
| Batch size                    | 100           |
| Learning rate                 | 0.001         |
| Learning rate scheduler       | Constant      |
| Loss function                 | L1            |

---



Table S5. 95% confidence interval (CI) on test set (10,000 samples) of Frag20-Aqsol-100K by each GNN under 2D and A3D featurization from bootstrapping (500,000 iterations)

| <b>Models</b>               | <b>Median</b> | <b>CI</b>      |
|-----------------------------|---------------|----------------|
| 2D-PNACConv                 | 1.168         | (1.133, 1.205) |
| A3D <sub>MM</sub> -PNACConv | 0.681         | (0.659, 0.704) |
| A3D <sub>QM</sub> -PNACConv | 0.432         | (0.416, 0.448) |
| 2D-DMPNN                    | 1.181         | (1.148, 1.216) |
| A3D-DMPNN                   | 0.757         | (0.733, 0.785) |
| A3D <sub>QM</sub> -DMPNN    | 0.544         | (0.519, 0.572) |
| 2D-GINConv                  | 1.209         | (1.179, 1.239) |
| A3D <sub>MM</sub> -GINConv  | 0.799         | (0.773, 0.825) |
| A3D <sub>QM</sub> -GINConv  | 0.557         | (0.528, 0.577) |
| 2D-GINEConv                 | 1.175         | (1.141, 1.207) |
| A3D <sub>MM</sub> -GINEConv | 0.742         | (0.718, 0.767) |
| A3D <sub>QM</sub> -GINEConv | 0.487         | (0.470, 0.507) |
| 2D-NNConv                   | 1.175         | (1.145, 1.206) |
| A3D <sub>MM</sub> -NNConv   | 0.715         | (0.693, 0.738) |
| A3D <sub>QM</sub> -NNConv   | 0.462         | (0.443, 0.485) |
| 2D-superGAT                 | 1.198         | (1.166, 1.232) |
| A3D <sub>MM</sub> -superGAT | 0.786         | (0.758, 0.817) |
| A3D <sub>QM</sub> -superGAT | 0.531         | (0.516, 0.547) |
| 2D-DNN                      | 2.805         | (2.752, 2.858) |
| A3D-DNN                     | 0.933         | (0.906, 0.962) |
| A3D <sub>QM</sub> -DNN      | 0.707         | (0.684, 0.731) |

Table S6. Statistical analysis between 2D-DMPNN-TS (Baseline) with other variants. The underscore bold components indicate where the difference between variant models and baseline locates.

| Models                                   | General performance (RMSE) | Median | 90% CI         | 90% CI of difference between baseline | Probability of difference >0 between baseline |
|------------------------------------------|----------------------------|--------|----------------|---------------------------------------|-----------------------------------------------|
| 2D-DMPNN-TS (Baseline)                   | 0.968±0.132                | 0.967  | (0.636, 1.482) | -                                     | -                                             |
| 2D- <u>PNAC</u> Conv-TS                  | 0.954±0.084                | 0.930  | (0.648, 1.255) | (-0.411, 0.573)                       | 58.03%                                        |
| <u>A3D</u> -DMPNN-TS                     | 1.054±0.101                | 1.035  | (0.780, 1.347) | (-0.485, 0.511)                       | 55.60%                                        |
| 2D-DMPNN- <u>FT</u>                      | 0.821±0.113                | 0.789  | (0.537, 1.144) | (-0.357, 0.789)                       | 71.02%                                        |
| <u>A3D</u> - <u>PNAC</u> Conv-TS         | 0.987±0.131                | 0.939  | (0.605, 1.420) | (-0.550, 0.611)                       | 53.81%                                        |
| 2D- <u>PNAC</u> Conv- <u>FT</u>          | 0.780±0.099                | 0.743  | (0.537, 1.090) | (-0.241, 0.790)                       | 76.84%                                        |
| <u>A3D</u> -DMPNN- <u>FT</u>             | 0.698±0.039                | 0.677  | (0.476, 0.933) | (-0.143, 0.831)                       | 85.31%                                        |
| <u>A3D</u> - <u>PNAC</u> Conv- <u>FT</u> | 0.661±0.086                | 0.647  | (0.446, 0.884) | (-0.062, 0.837)                       | <b>89.76%</b>                                 |

## References

1. Xu, K.; Hu, W.; Leskovec, J.; Jegelka, S. How Powerful Are Graph Neural Networks **2018**? arXiv: 1810.00826. arXiv.org e-Print archive. <https://arxiv.org/abs/1810.00826>
2. Hu, W.; Liu, B.; Gomes, J.; Zitnik, M.; Liang, P.; Pande, V.; Leskovec, J. Strategies for Pre-Training Graph Neural Networks **2019**. arXiv: 1905.12265. arXiv.org e-Print archive. <https://arxiv.org/abs/1905.12265>
3. Gilmer, J.; Schoenholz, S. S.; Riley, P. F.; Vinyals, O.; Dahl, G. E. Neural Message Passing for Quantum Chemistry **2017**. arXiv: 1704.01212. arXiv.org e-Print archive. <https://arxiv.org/abs/1704.01212>
4. Corso, G.; Cavalleri, L.; Beaini, D.; Liò, P.; Veličković, P. Principal Neighbourhood Aggregation for Graph Nets **2020**. arXiv: 2004.05718. arXiv.org e-Print archive. <https://arxiv.org/abs/2004.05718>
5. Kim, D.; Oh, A. How to find your friendly neighborhood: graph attention design with self-supervision. *ICLR* **2021**.
6. Yang, K.; Swanson, K.; Jin, W.; Coley, C.; Eiden, P.; Gao, H.; Guzman-Perez, A.; Hopper, T.; Kelley, B.; Mathea, M.; Palmer, A.; Settels, V.; Jaakkola, T.; Jensen, K.; Barzilay, R. Analyzing Learned Molecular Representations for Property Prediction. *J. Chem. Inf. Model.* **2019**, *59*, 3370–3388.
